# Supplementary material for: Genetic mapping of natural variation in a shade avoidance response: ELF3 is the candidate gene for a QTL in hypocotyl growth regulation
Source: PubMed Central journal article supplement — J Exp Bot. 2010 Aug 16;62(1):167–76. doi: 10.1093/jxb/erq253 (PMC2993907; doi:10.1093/jxb/erq253), 2010-08-16
Supplement: supp_erq253_00050062-file001.pdf [file supp_erq253_00050062-file001.pdf]

## Genetic mapping of natural variation for a shade avoidance response in *Arabidopsis thaliana*: *ELF3* is a candidate gene for *EODINDEX1* QTL

M. Paula Coluccio, Sabrina E. Sanchez, Luciana Kasulin, Marcelo J. Yanovsky and Javier F. Botto

### Supplementary material

**Table S1:** List of primer sequences used for qRT-PCR expression analysis.

| Primer  | Sequence (5' – 3')        |
|---------|---------------------------|
| PP2A-F  | TAACGTGGCCAAAATGATGC      |
| PP2A-R  | GTTCTCCACAACCGCTTGGT      |
| CCA1-F  | CCAGATAAGAAGTCACGCTCAGAA  |
| CCA1-R  | GTCTAGCGCTTGACCCATAGCT    |
| LHY-F   | GACTCAAACACTGCCCAGAAGA    |
| LHY-R   | CGTCACTCCCTGAAGGTGTATTT   |
| TOC-F   | TCTTCGCAGAATCCCTGTGAT     |
| TOC-R   | GCTGCACCTAGCTTCAAGCA      |
| PRR7-F  | CTAACCCCTGAGTTTCCAAGTAATC |
| PRR7-R  | CCCATTGTGACATCTTCAAATT    |
| PRR9-F  | GCCAGAGAGAAGCTGCATTGA     |
| PRR9-R  | CCTGCTCTGGTACCGAACCTT     |
| ELF3- F | CATTCGCAGCCGTTGATGAGG     |
| ELF3-R  | TGTTCTTGTCGTCGTTGTGGTTG   |
| TZP- F  | GGCTCGGGAAATGGGAAGAAG     |
| TZP-R   | ACTCAACAAGGCAAGTCACACC    |

**Table S2:** Summary statistics for hypocotyl length under WL, WL+EOD and EOD index. Data are means  $\pm$  SE.

|                | WL              | WL+EOD          | EOD index<br>[(WL+EOD) – WL] / ( WL+EOD) |
|----------------|-----------------|-----------------|------------------------------------------|
| Bay            | 3.93 $\pm$ 0.74 | 7.08 $\pm$ 0.84 | 0.40 $\pm$ 0.04                          |
| Sha            | 6.78 $\pm$ 0.66 | 7.80 $\pm$ 0.56 | 0.10 $\pm$ 0.04                          |
| RIL mean       | 5.58 $\pm$ 1.65 | 8.09 $\pm$ 1.56 | 0.31 $\pm$ 0.01                          |
| RIL max – min  | 2.33 – 10.70    | 4.43 – 11.53    | 0.05 – 0.61                              |
| H <sup>2</sup> | 0.88            | 0.81            | 0.73                                     |

H<sup>2</sup> is defined as broad sense heritability calculated as  $\sigma^2_G/\sigma^2_P$ . H<sup>2</sup> is the proportion of the total phenotypic variance that is genetic ( $V_g/(V_g+V_e)$ ).

**Table S3:** QTL mapping for hypocotyl length under WL, WL+EOD and EOD index in Bay x Sha RIL population.

| QTL                       | Closest marker<br>(# Chrom) | Position<br>(cM) | WL    |                  |               |                | WL + EOD |                  |               |                | EOD index<br>[(WL+EOD) – WL] / ( WL+EOD) |                  |       |                |
|---------------------------|-----------------------------|------------------|-------|------------------|---------------|----------------|----------|------------------|---------------|----------------|------------------------------------------|------------------|-------|----------------|
|                           |                             |                  | LOD   | Interval<br>(cM) | 2xADD<br>(mm) | Variab.<br>(%) | LOD      | Interval<br>(cM) | 2xADD<br>(mm) | Variab.<br>(%) | LOD                                      | Interval<br>(cM) | 2xADD | Variab.<br>(%) |
| <i>WL1</i>                | MSAT5.9 (CV)                | 44.4             | 17.80 | 39-49            | -2.19         | 44             |          |                  |               |                |                                          |                  |       |                |
| <i>WL2</i>                | MSAT2.41 (CII)              | 36.5             | 9.44  | 33-40            | -1.98         | 19             |          |                  |               |                |                                          |                  |       |                |
| <i>WL3***</i>             | NGA248 (CI)                 | 26.9             | 2.82  | 15-38            | 0.81          | 6              |          |                  |               |                |                                          |                  |       |                |
| <i>EOD1</i>               | MSAT5.9 (CV)                | 45.4             |       |                  |               |                | 17.57    | 40-49            | -2.15         | 47             |                                          |                  |       |                |
| <i>EOD2</i>               | NGA248 (CI)                 | 30.9             |       |                  |               |                | 4.66     | 20-38            | 1.18          | 14             |                                          |                  |       |                |
| <b><i>EODINDEX1*</i></b>  | MSAT2.41 (CII)              | 35.5             |       |                  |               |                |          |                  |               |                | 14.94                                    | 31-40            | 0.13  | 31             |
| <b><i>EODINDEX2**</i></b> | MSAT5.9 (CV)                | 44.9             |       |                  |               |                |          |                  |               |                | 8.67                                     | 38-49            | 0.10  | 19             |
| <i>EODINDEX3</i>          | MSAT1.13 (CI)               | 81.4             |       |                  |               |                |          |                  |               |                | 3.21                                     | 70-84            | 0.06  | 6.9            |
| <i>EODINDEX4</i>          | NGA128 (CI)                 | 50.1             |       |                  |               |                |          |                  |               |                | 2.84                                     | 43-64            | 0.06  | 6.0            |

\**EODINDEX1* colocalized with *WL2* QTL.

\*\**EODINDEX2* colocalized with *WL1* and *EOD1* QTL.

\*\*\**WL3* colocalized with *EOD2* QTL.

**Figure S1:** Polymorphisms found in *ELF3* sequence of Bay and Sha accessions. Exon sequences in upper case, introns in lower case and nucleotide changes highlighted in grey.

| Genomic sequence |                           |
|------------------|---------------------------|
|                  | 508                       |
| Bay              | ctt atg att gcc ctg ..... |
| Sha              | ctt gtg att gcc ctg ..... |
|                  | 1171                      |
| Bay              | ATG GCA GTC CTG AAG       |
| Sha              | ATG GTA GTC CTG AAG       |
|                  | 1594                      |
| Bay              | cac tct cct tca tat ..... |
| Sha              | cac gct cct tca tat ..... |
|                  | 1609                      |
| Bay              | ttt ttt tca tga tta       |
| Sha              | ttt ttt -ca tga tta       |
|                  | 1819                      |
| Bay              | aca ttg gat cat gtt ..... |
| Sha              | acg ttg gat cat gtt ..... |
|                  | 2170                      |
| Bay              | gat tgt agg ctt cat       |
| Sha              | gat tat agg ctt cat       |
|                  | 2635                      |
| Bay              | tat gct tcc atg agt ..... |
| Sha              | tat gtt tcc atg agt ..... |
|                  | 2710                      |
| Bay              | CTT ATT GCT GCA TCA       |
| Sha              | CTT ATT GTT GCA TCA       |
|                  | 3283                      |
| Bay              | CAA CAA CAA CAA CAA ..... |
| Sha              | CCC AAT GAG CAA ATG ..... |
|                  | 3298                      |
| Bay              | CAA CAA CAA CCC AAT       |
| Sha              | AAC CAG TTT GGA CAT       |
